# Supplementary material for: Fabrication of stimuli-responsive nanogels for protein encapsulation and traceless release without introducing organic solvents, surfactants, or small-molecule cross-linkers
Source: Royal Society of Chemistry journal article supplement (doi:10.1039/d0py01600d), 2020-12-16
Supplement: d0py01600d1.pdf [file d0py01600d1.pdf]

## Supporting Information

### Fabrication of Stimuli-Responsive Nanogels for Protein Encapsulation and Traceless Release without Introducing Organic Solvents, Surfactants or Small-Molecule Cross-Linkers

Yue Zhang\*, Daowen Zhang, Jintao Wang\*, Xiaojie Zhang\* and

Yongfang Yang

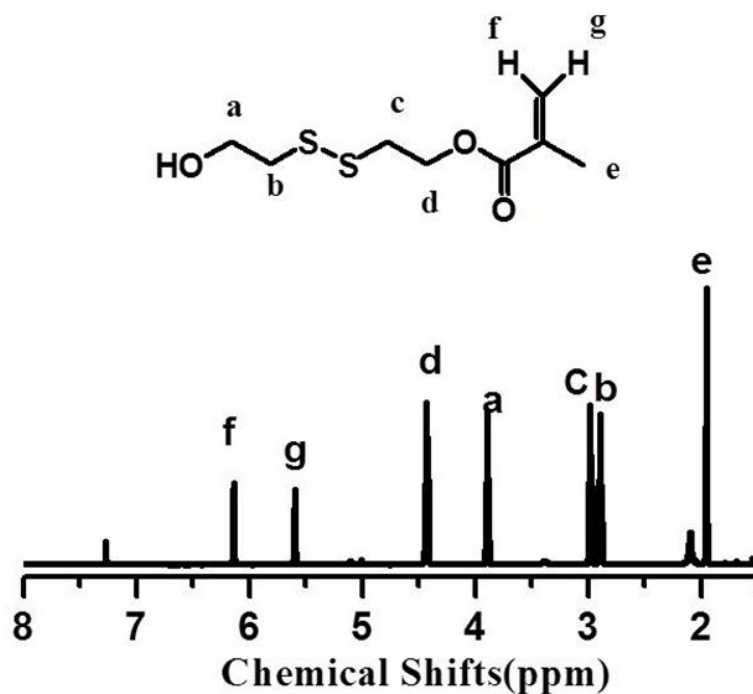

**Figure S1.** <sup>1</sup>H NMR spectrum of the monomer 2-(2-(2-hydroxyethyl) disulfanyl) ethyl methacrylate (HODMA).

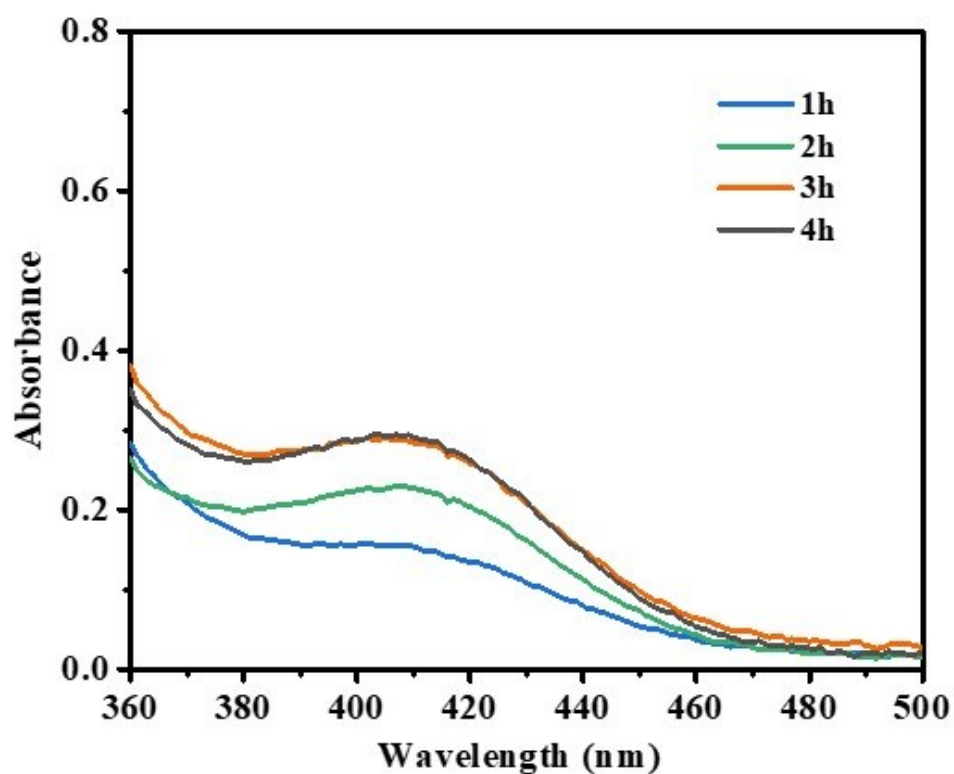

**Figure S2.** The UV-vis spectra of the nanogel N-B preparation solution at different times.

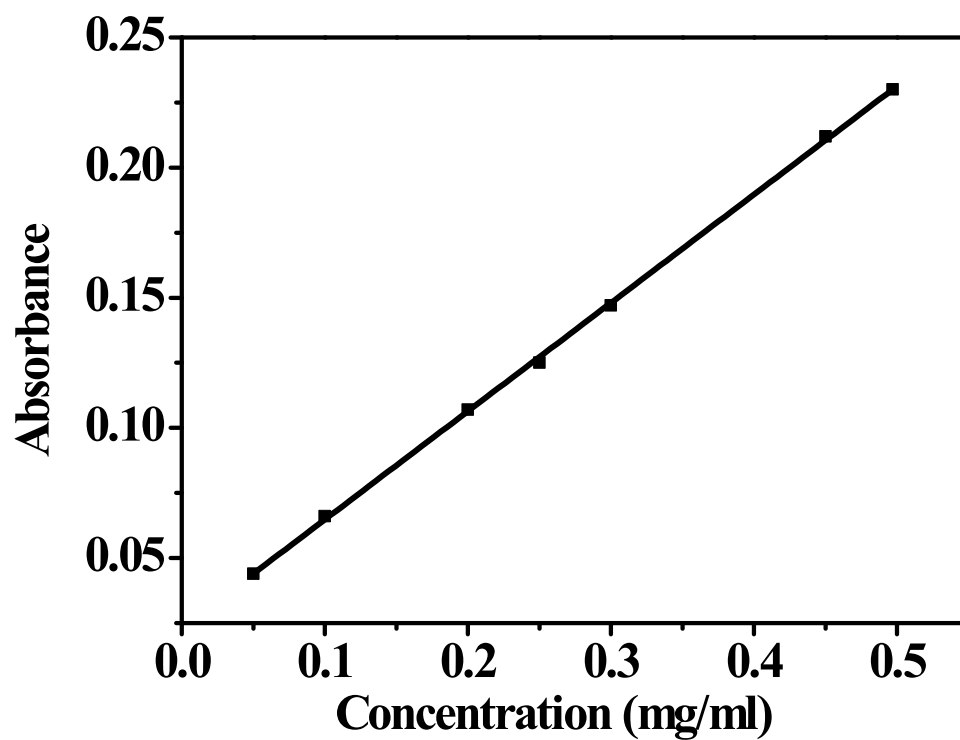

**Figure S3.** The standard curve of BCA method used in BSA quantitative measurement.

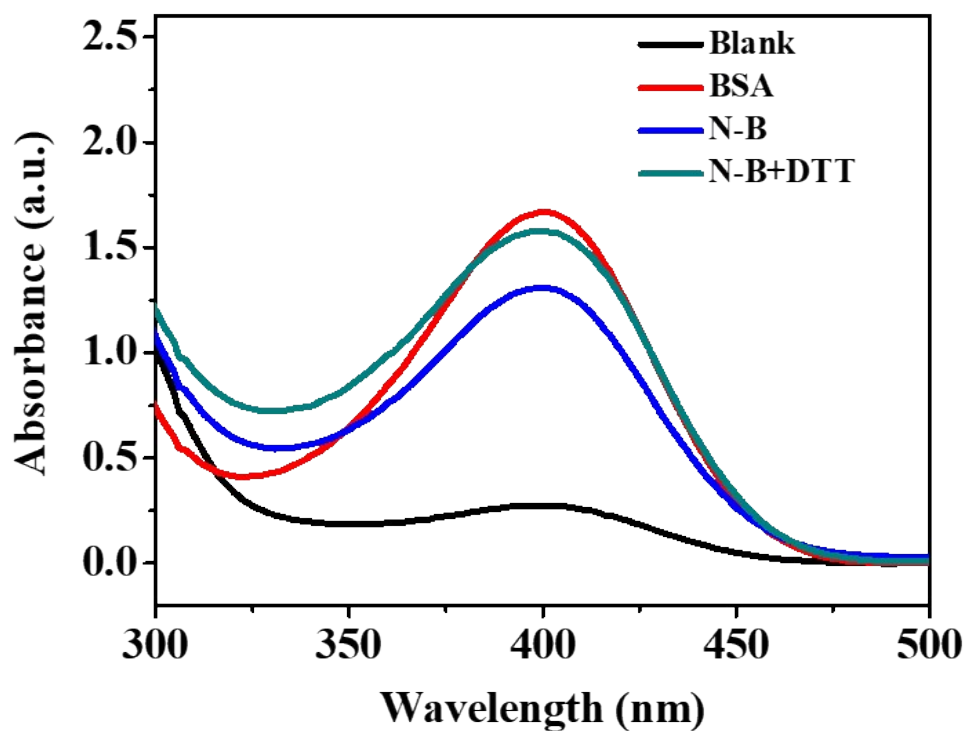

**Figure S4.** UV-Vis absorbance spectra of NPA hydrolysis catalyzed by BSA, N-B and DTT treated N-B.

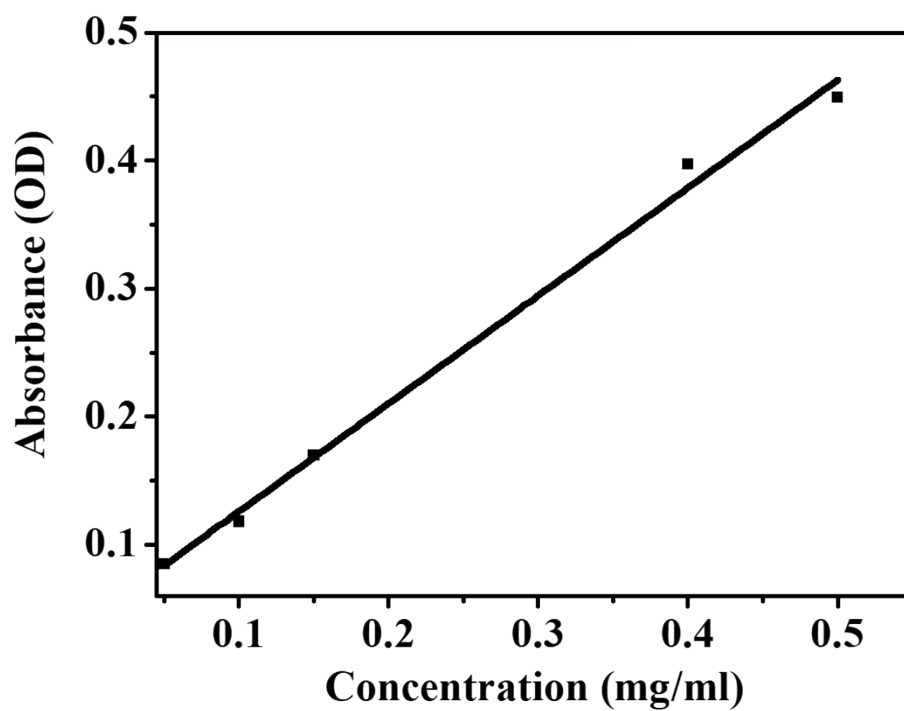

**Figure S5.** The standard curve of BCA method used in lysozyme quantitative measurement.

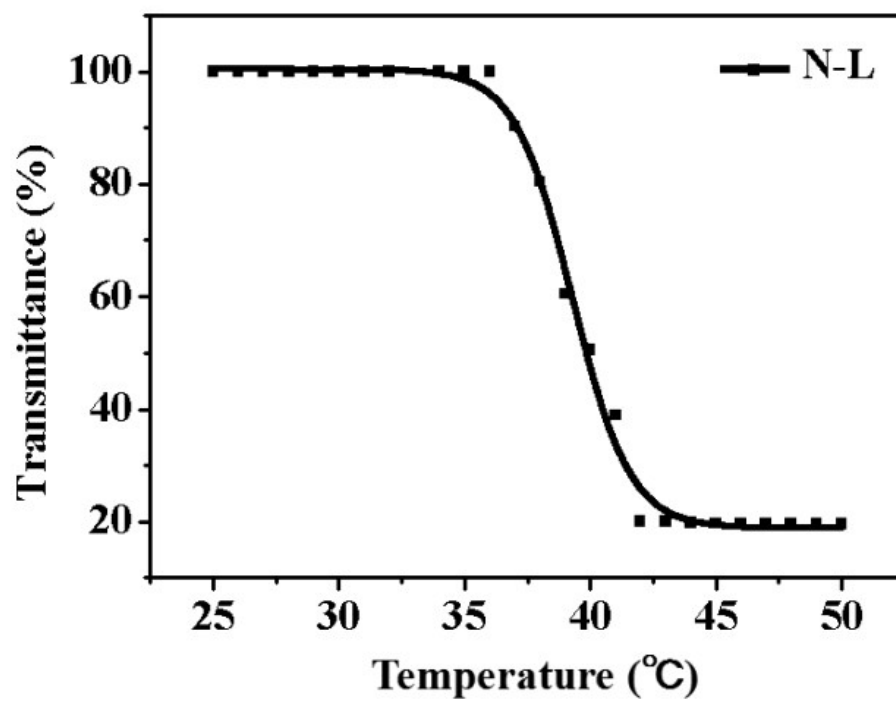

**Figure S6.** Transmittance of N-L aqueous solution as a function of temperature.
